# Supplementary material
Source: HighWire-hosted journal article supplement (https://www.qdcxjkg.com/highwire/filestream/113561/field_highwire_adjunct_files/14/42_Clara1943.pdf)
Supplement: 42_Clara1943.pdf [file 42_Clara1943.pdf]

Reference no. 42 of

Winkelmann A, Noack T: The Clara cell – a 'Third Reich eponym'? *Eur Respir J* 2010; 36: 722–727

Clara M: Letter to the administration of the prison München-Stadelheim, dated 31 May 1943. 1943. *Archive*: Staatsarchiv, München. *Signature*: JVA München 28281.

**Short comment by the authors:**

In this short letter, Clara reports that several relatives of execution victims had approached the institute of anatomy to claim the body and that he could not follow these requests as the bodies were needed for research and teaching. Clara suggests not informing the relatives about the destination of the bodies after execution.

Anatomische Anstalt  
München 15

Hofenkofstr. 11 - Telefon 57745

Direktor:  
Prof. Dr. W. Clara

An den

Herrn Vorstand des Strafgefängnisses  
München - Stadelheim

München, den 31. Mai 1943.

|                      |             |
|----------------------|-------------|
| Strafgefängnis       |             |
| München - Stadelheim |             |
| Dat.                 | 1. JUN 1943 |
| Nr.                  | Ref.        |

In der letzten Zeit haben sich verschiedentlich Angehörige von Hingerichteten an mich gewandt mit dem Ersuchen, die Leiche, welche von der Staatsanwaltschaft ordnungsgemäß der Anatomischen Anstalt übergeben worden war, an sie auszuhandigen. Da die der Anatomischen Anstalt überlassene Leichen dringend für Forschung und Unterricht benötigt werden, muß ein solches Ersuchen der Angehörigen unter allen Umständen von mir abgelehnt werden.

Um solche Gesuche in Zukunft zu vermeiden, erlaube ich mir den Vorschlag, daß die Angehörigen bei der Mitteilung der vollzogenen Hinrichtung keine Angaben über den Verbleib erhalten.

Der Direktor:

*Clara*
